# Supplementary material for: In situ Pt single-atom trapping on TiO2 nanotubes via ultrasonication: a one-pot approach to produce active electrodes for electrocatalytic H2 evolution
Source: Royal Society of Chemistry journal article supplement (doi:10.1039/d4se01214c), 2024-01-01
Supplement: d4se01214c1.pdf [file d4se01214c1.pdf]

## Supplementary Materials

### **In situ Pt single-atom trapping on TiO<sub>2</sub> nanotubes via ultrasonication: A one-pot approach to produce active electrodes for electrocatalytic H<sub>2</sub> evolution**

Sina Hejazi<sup>1</sup>, Sadegh Pour-Ali<sup>2,3</sup>, Ali Kosari<sup>4</sup>, Nastaran Farahbakhsh<sup>1</sup>, Manuela S. Killian<sup>1\*</sup>,

Shiva Mohajernia<sup>1,2\*</sup>

<sup>1</sup> *Department of Chemistry and Biology, CSnM, University of Siegen, Siegen, Germany*

<sup>2</sup> *Department of Chemical and Materials Engineering, NRGMATs, University of Alberta, Donadeo Innovation Centre for Engineering, Edmonton, Canada*

<sup>3</sup> *Faculty of Materials Engineering, Sahand University of Technology, Tabriz, Iran*

<sup>4</sup> *Thermo Fisher Scientific, Eindhoven, the Netherlands*

*\*Corresponding author email: [mohajernia@ualberta.ca](mailto:mohajernia@ualberta.ca), [manuela.killian@uni-siegen.de](mailto:manuela.killian@uni-siegen.de)*

Table S1. Equivalent circuit parameters were obtained by fitting the impedance spectra of anatase, 2 h, and 8 h sonicated samples.

|                                   | $R_s$ | $R_{ct}$ | $Q_{dl}$              | $n$  |
|-----------------------------------|-------|----------|-----------------------|------|
| <b>Anatase TNTs</b>               | 2.2   | 93.31k   | $0.4 \times 10^{-3}$  | 0.96 |
| <b>2 h sonicated anatase TNTs</b> | 2.4   | 18.25k   | $1.44 \times 10^{-3}$ | 0.98 |
| <b>8 h sonicated anatase TNTs</b> | 2.3   | 0.95k    | $3.11 \times 10^{-3}$ | 0.95 |

Table S2. A comparison of the proposed HER electrocatalyst with some recently reported ones.

| Electrocatalyst                             | Solution                             | Overpotential                   | Tafel slope (mV/decade) | Reference    |
|---------------------------------------------|--------------------------------------|---------------------------------|-------------------------|--------------|
| <b>Ag@Pt icosahedral NCs</b>                | 0.5 M H <sub>2</sub> SO <sub>4</sub> | 35 mV @ 10 mA/cm <sup>2</sup>   | 38.29                   | [42]         |
| <b>Pt-W<sub>18</sub>O<sub>49</sub></b>      | 0.5 M H <sub>2</sub> SO <sub>4</sub> | 743 mV @ 500 mA/cm <sup>2</sup> | 74                      | [43]         |
| <b>Mo<sub>2</sub>N-Mo<sub>2</sub>C/N-CW</b> | 0.5 M H <sub>2</sub> SO <sub>4</sub> | 311 mV @ 500 mA/cm <sup>2</sup> | 94                      | [44]         |
| <b>Cr-CoP-NR/CC</b>                         | 0.5 M H <sub>2</sub> SO <sub>4</sub> | 209 mV @ 500 mA/cm <sup>2</sup> | 44.8                    | [45]         |
| <b>Pd<sub>3</sub>Ru/C</b>                   | 1 M KOH                              | 104 mV @ 10 mA/cm <sup>2</sup>  | -                       | [46]         |
| <b>PdRu@FeO<sub>x</sub></b>                 | 1 M KOH                              | 27 mV @ 100 mA/cm <sup>2</sup>  | 83.7                    | [47]         |
| <b>Pt SAs@TNTs</b>                          | 0.5 M H <sub>2</sub> SO <sub>4</sub> | 116 mV @ 10 mA/cm <sup>2</sup>  | 44                      | Present work |

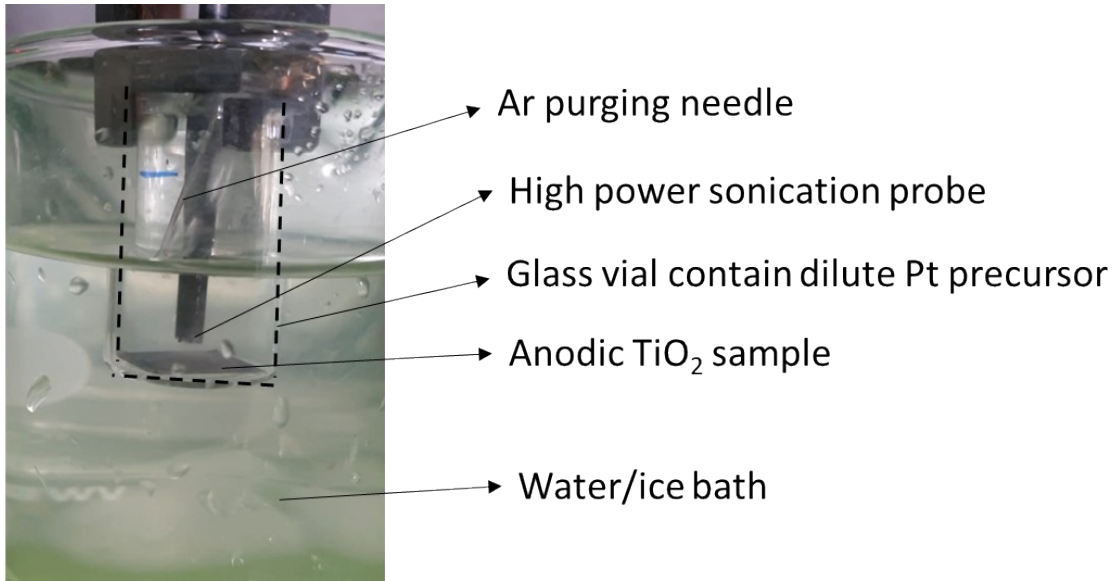

Fig. S1 Actual image of the high power sonication setup used for in situ defect formation and SA decoration of the anodic TiO<sub>2</sub> layer.

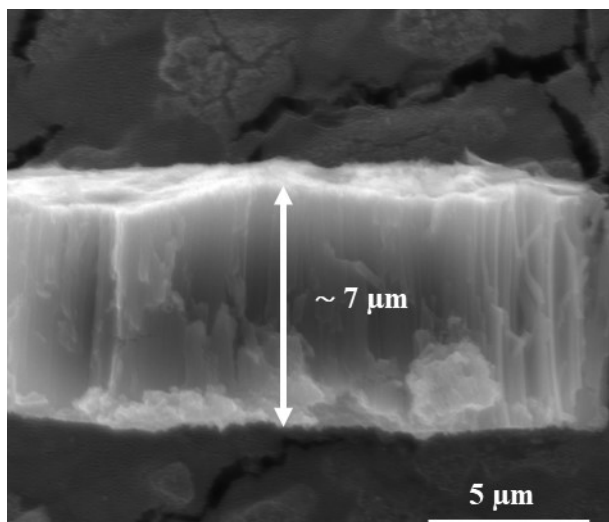

Fig. S2 SEM image of the cross-section of the TiO<sub>2</sub> nanotubes used in the ultrasonication process.

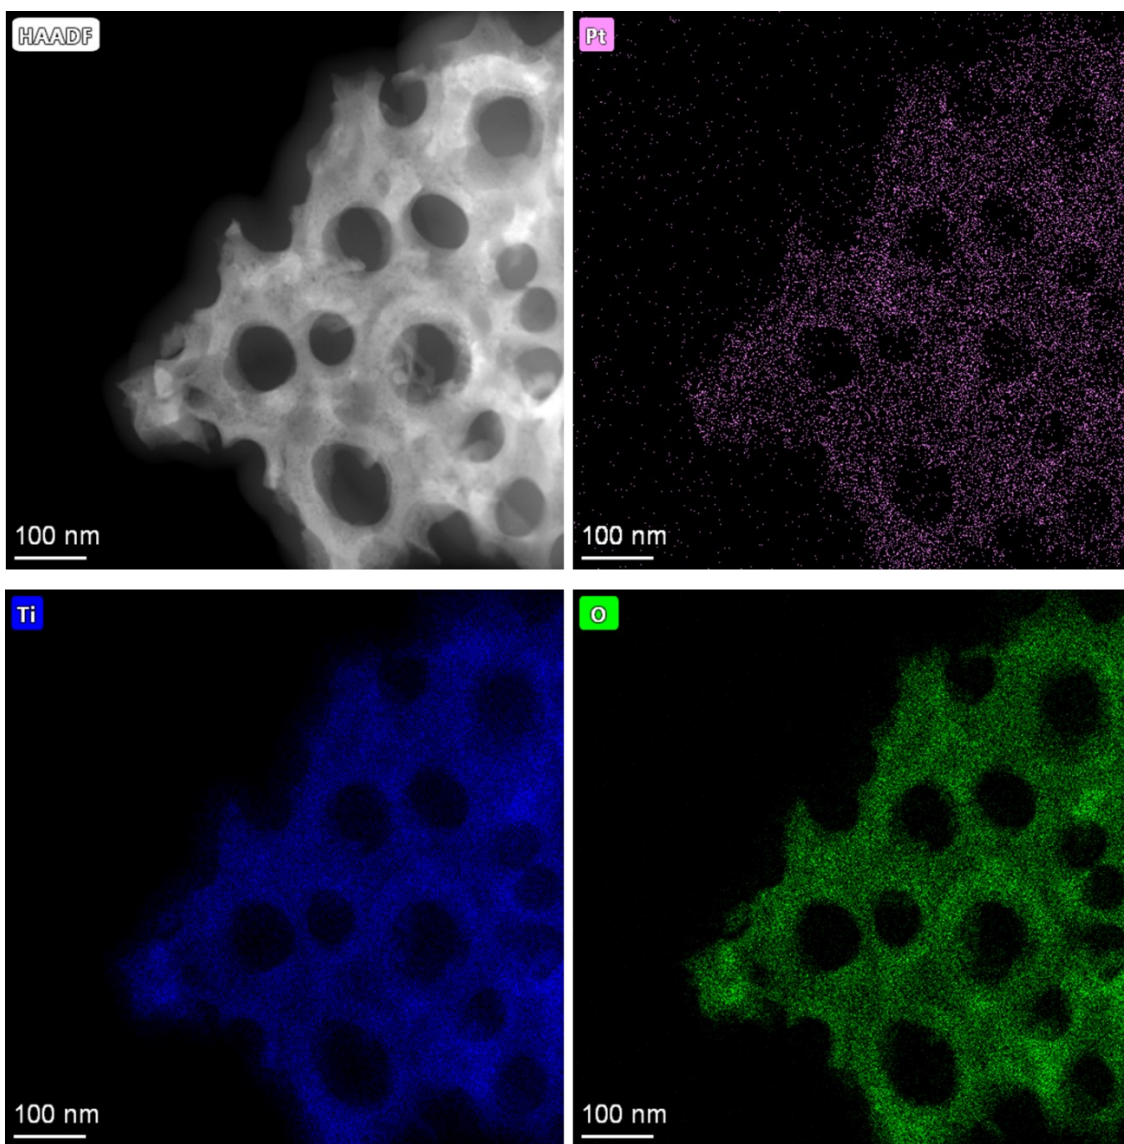

Fig. S3 HAADF-STEM image and EDX chemical maps of the top surface of the Pt-decorated TNTs sample after 8 h sonication in the Pt precursor.

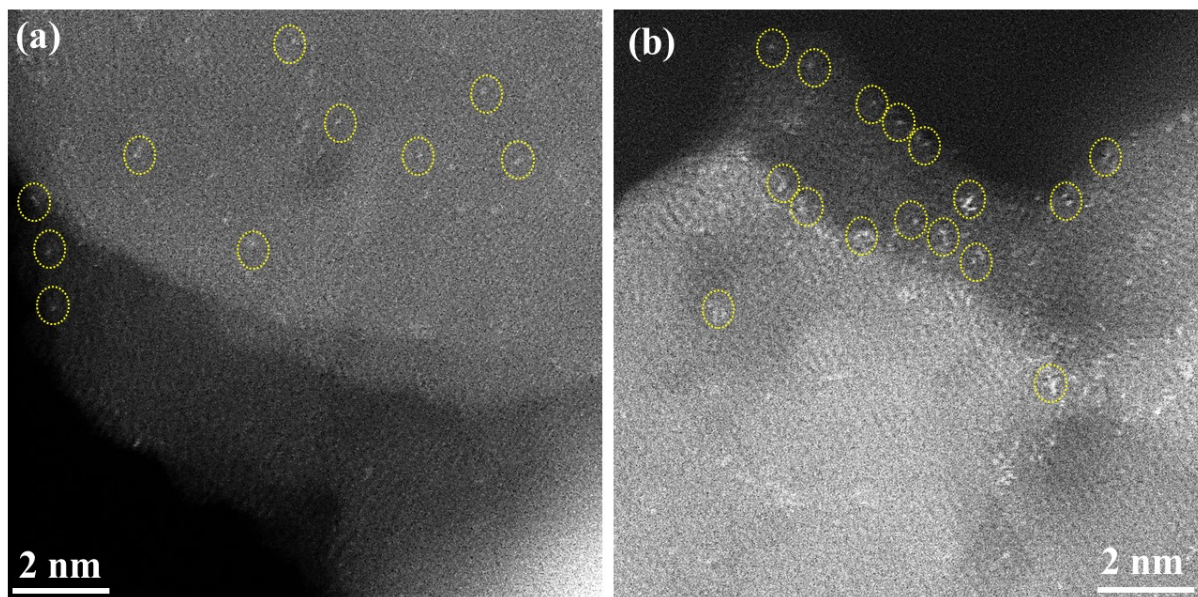

Fig. S4 HAADF-STEM images taken from the various middle-broken regions of TNTs sonicated in the diluted Pt precursor, revealing the Pt SAs decoration.

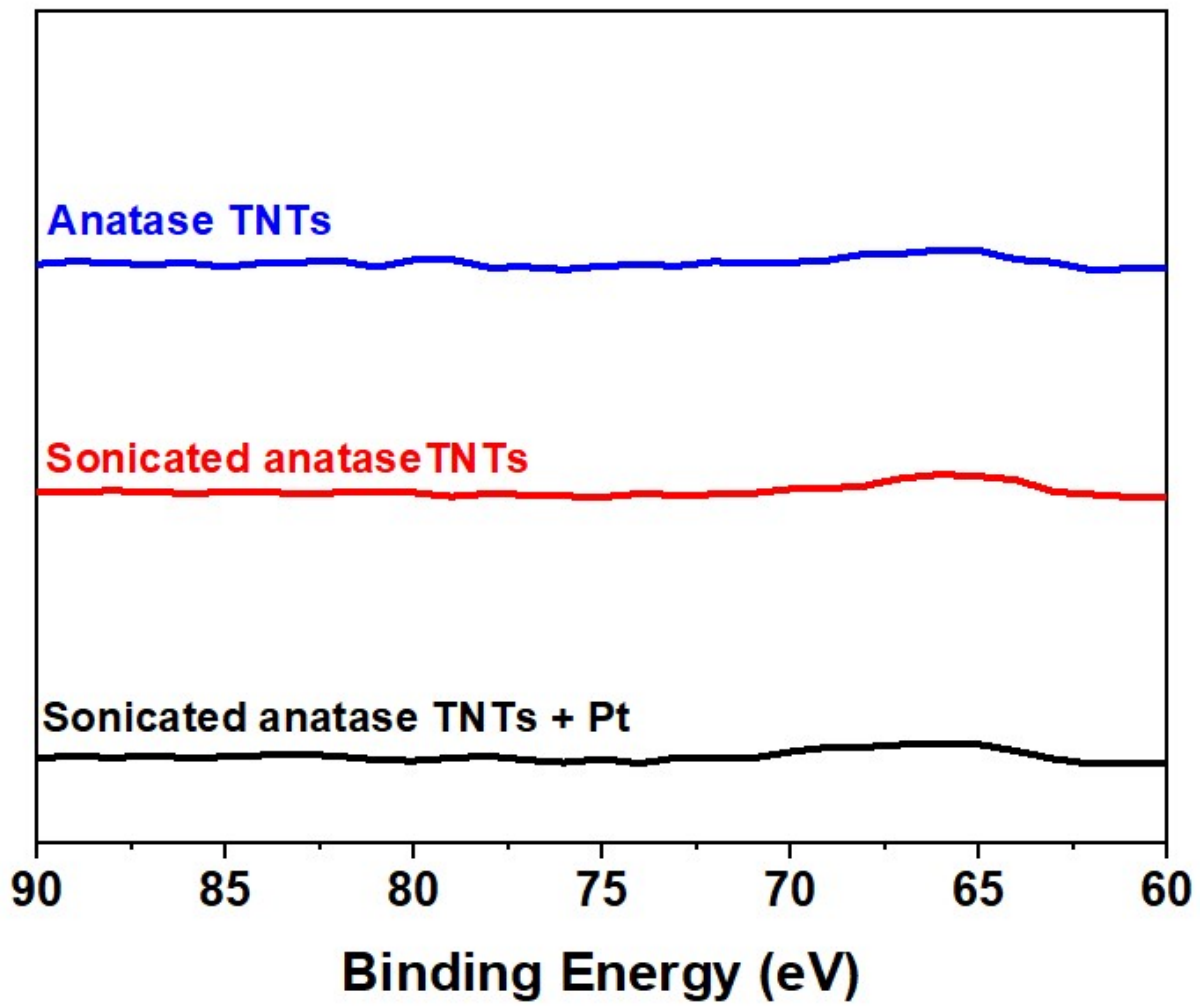

Fig. S5 A zoomed-in view of the binding energy range related to the oxidation states of Pt in the survey XPS spectrum.

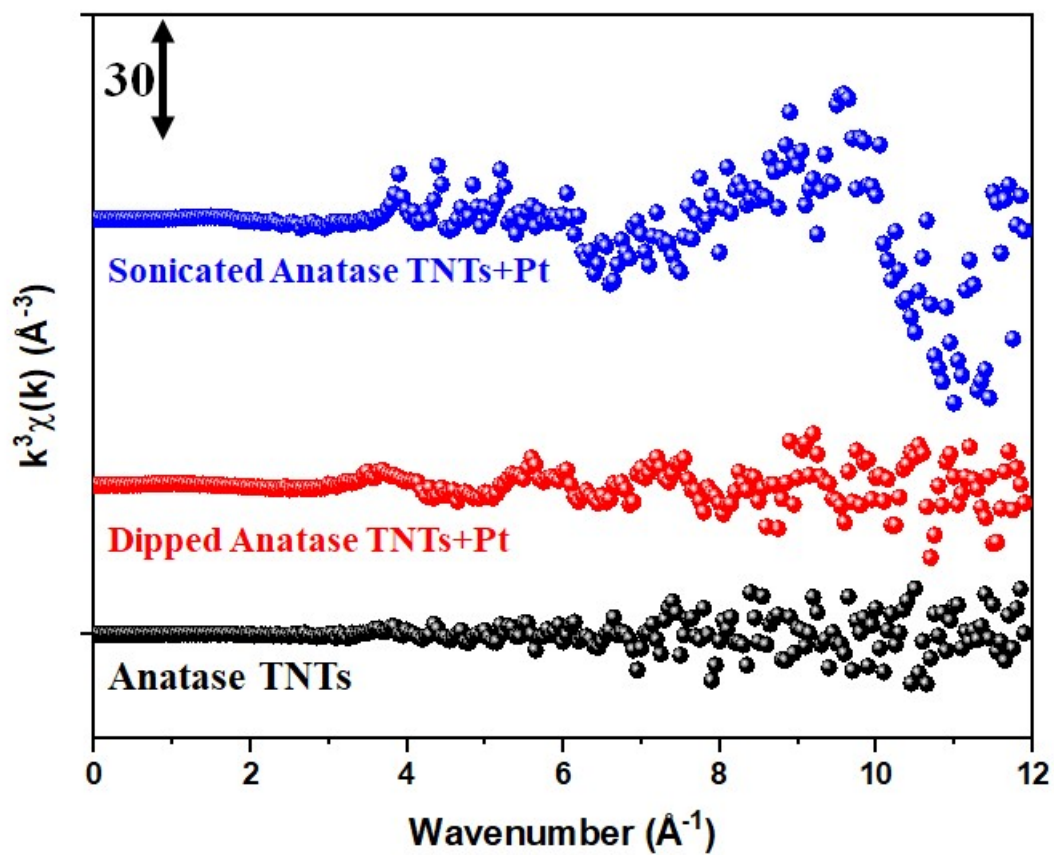

Fig. S6 K-space spectra regarding the XAS data for the anatase  $\text{TiO}_2$ , dipped and sonicated  $\text{TiO}_2$  nanotubes in Pt precursor with the same concentration and for the same time.



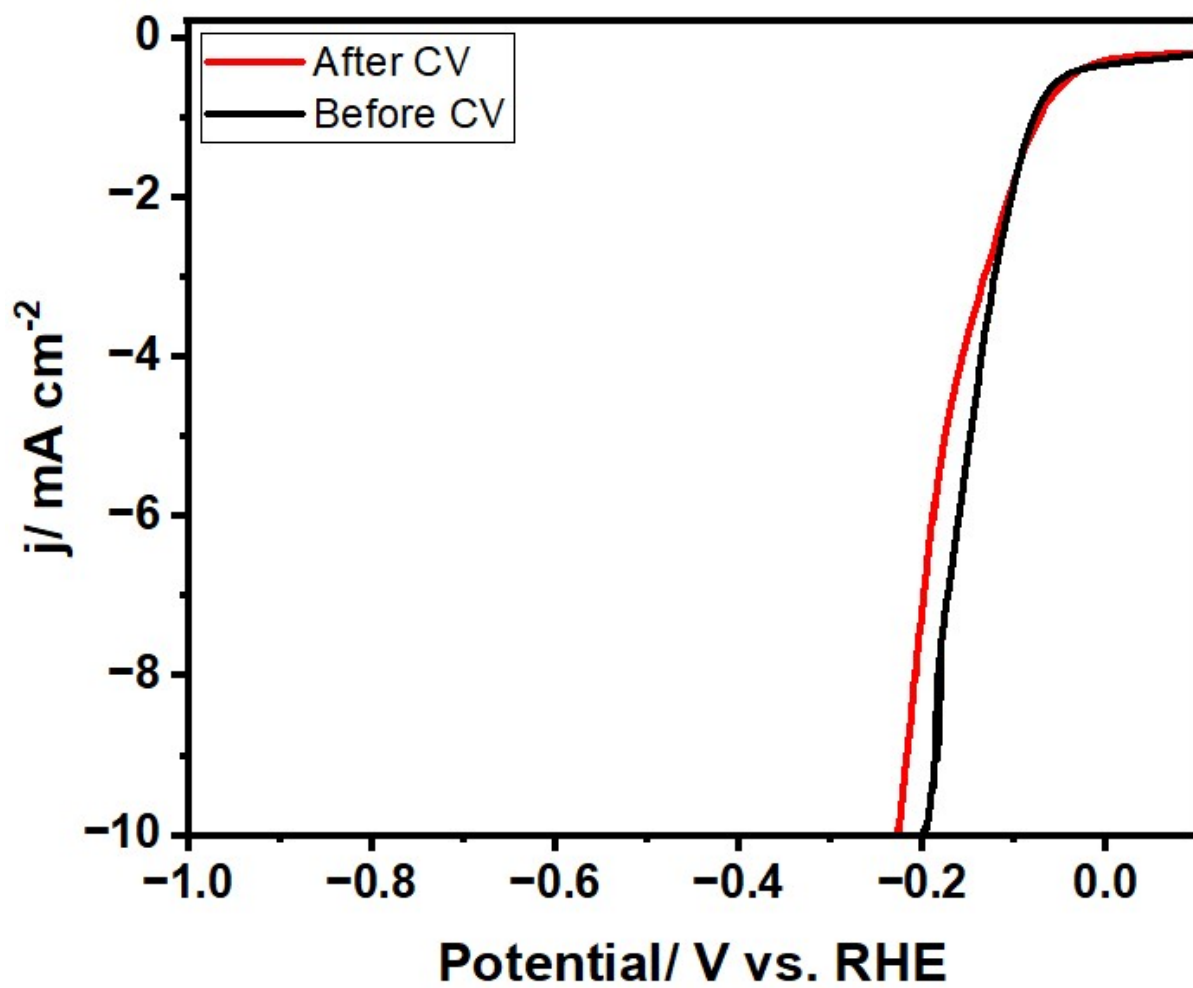

Fig. S7 LSV curves of the TNTs sonicated in Pt precursor, recorded before and after 20000 CV cycles.
